# Supplementary material
Source: Springer Nature journal article supplement (https://www.springermedizin.de/resource/supplementary/12889_2014_7113_MOESM1_ESM.pdf/9499884)
Supplement: MOESM1 [file 9499884]

Block 1: Age

in months

Block 2: Socioeconomic and demographic determinants

Mother's age , who stayed at home with the child when s/he was not in day care , Mother's years of education

family income , whether the mother or caregiver had received information about oral health

Block 3: Mother's history of caries

yes

no

Block 4: Child's health status

previous child hospitalization ,  
antibiotic use in the last year , whether the child had already visited the dentist fa

Block 5: Dietary child habits

nighttime breastfeeding after 1 year ,  
use of a night bottle , frequency of sucrose consumption between main meals

Block 6: Child oral hygiene data

when teeth brushing started , who does the brushing , number of times a day the child's teeth are brushed

Block 7: Visible biofilm

<15% presence of visible plaque or ≥15%

Block 8: level of SM contamination in the saliva

<10<sup>5</sup> or ≥ 10<sup>5</sup> colony-forming units

Early childhood caries
